# Supplementary material for: Household Cooking Frequency of Dinner Among Non-Hispanic Black Adults is Associated with Income and Employment, Perceived Diet Quality and Varied Objective Diet Quality, HEI (Healthy Eating Index): NHANES Analysis 2007–2010
Source: MDPI journal article supplement (doi:10.3390/nu11092057), 2019-09-02
Supplement: s1 [file s1]

1 **Supplement figure 1 a-f.** Adjusted means for dietary quality by Total Daily and Dinner HEI scores by income categories: <130%, 131-185%, and > 185%  
2 income to poverty ratios. All models adjusted for gender, marital status, education, food security, birthplace, PDQ, and age. Reference group is high cook  
3 group. (observations = 2242, weighted population = 25,392,351 for daily; observations = 2027; weighted population = 22,883,113 for dinner). Bolded numbers  
4 indicate p-value <0.05.

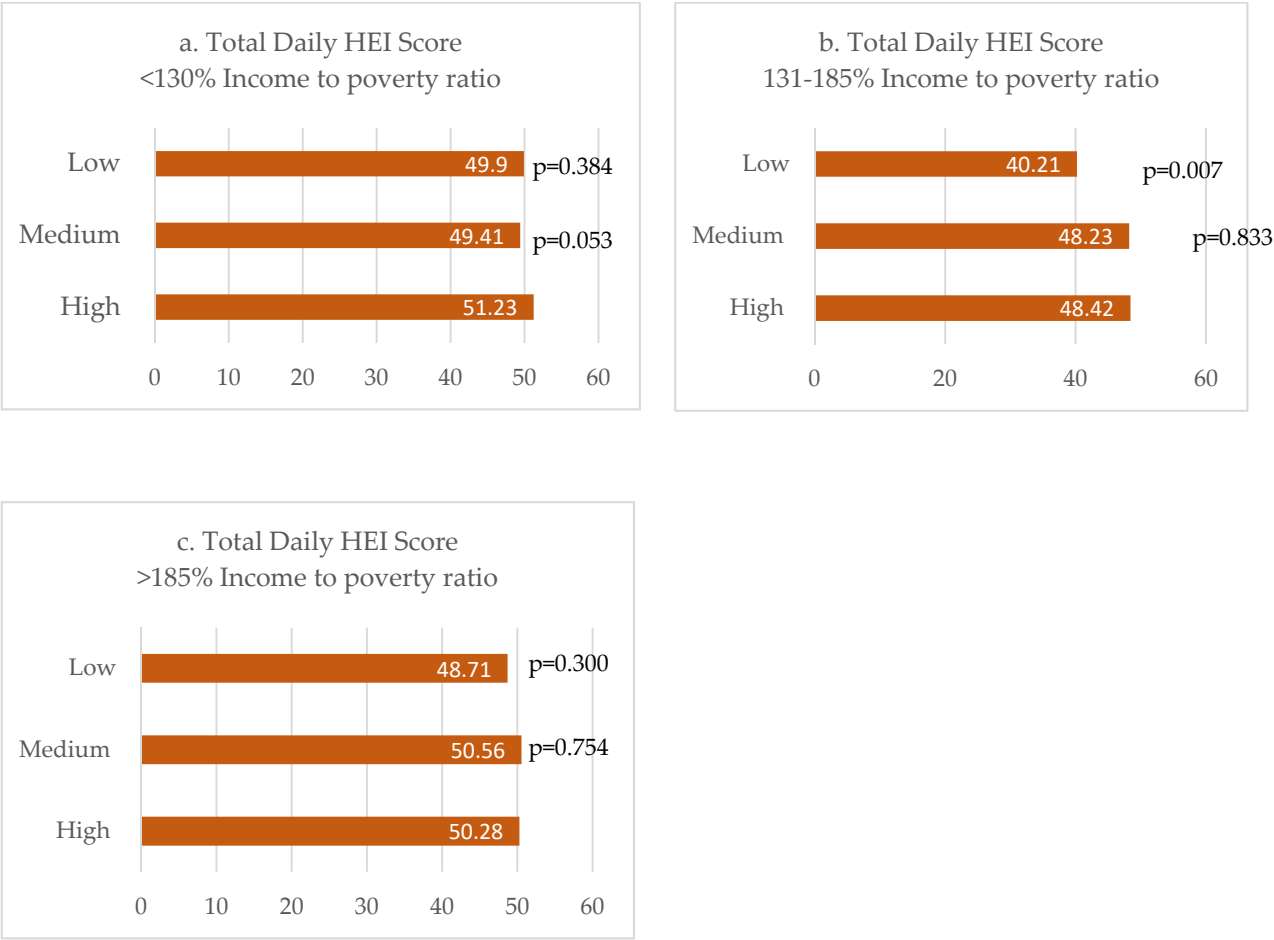

8

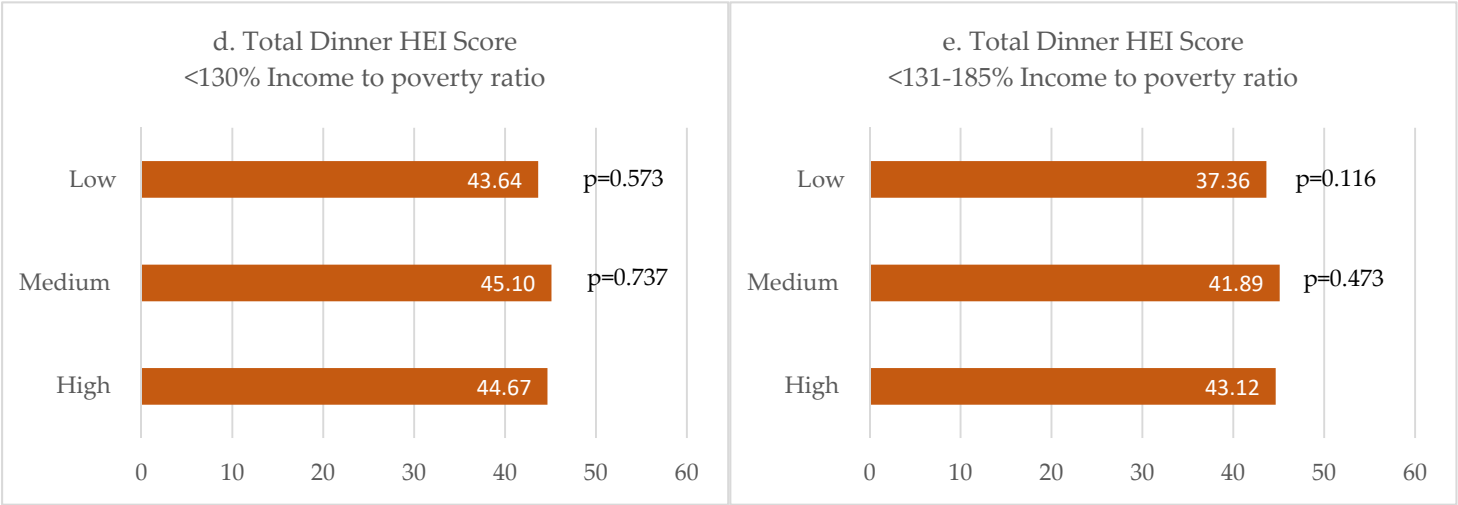

9

10

11

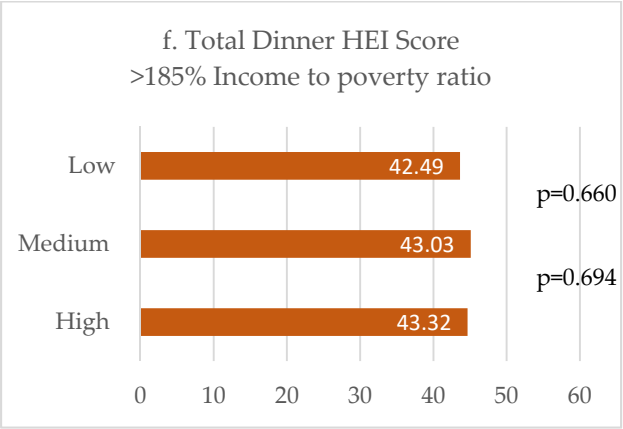

12

13
